# Supplementary material
Source: PubMed Central journal article supplement (PMC3040288)
Supplement: NIHMS264946-supplement-1_si_001.pdf [file NIHMS264946-supplement-1_si_001.pdf]

## Identification of Molecular-Mimicry-Based Ligands for Cholera Diagnostics using Magnetic Relaxation

Charalambos Kaittanis,<sup>‡</sup> Tuhina Banerjee,<sup>#</sup> Santimukul Santra,<sup>‡</sup> Oscar J. Santiesteban,<sup>\*</sup>  
Ken Teter,<sup>#</sup> J. Manuel Perez<sup>‡, #, \*</sup>

<sup>‡</sup>Nanoscience Technology Center, <sup>#</sup>Burnett School of Biomedical Sciences – College of Medicine, <sup>\*</sup>Department of Chemistry, University of Central Florida, 12424 Research Parkway, Suite 400, Orlando, FL 32826

jmperez@mail.ucf.edu

### Supportive Information

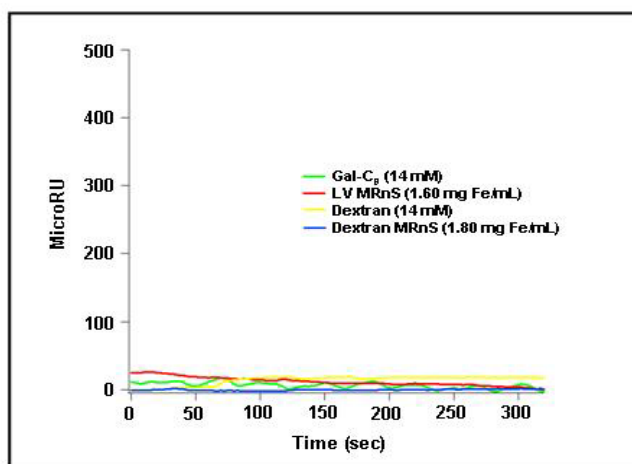

**SI Figure 1.** Absence of interaction between the tetanus toxin C fragment (TTC) and either free carbohydrates (dextran and galactose) or MRnS, as indicated by the lack of an SPR response pattern.
